# Supplementary material for: Influences of Adhesion Variability on the “Living” Dynamics of Filamentous Bacteria in Microfluidic Channels
Source: MDPI journal article supplement (doi:10.3390/molecules21080985), 2016-07-28
Supplement: s1 [file s1]

## Supplementary Materials: Influences of Adhesion Variability on the “Living” Dynamics of Filamentous Bacteria in Microfluidic Channels

Justin P. Jahnke, Jessica L. Terrell, Austin M. Smith, Xuanhong Cheng and Dimitra N. Stratis-Cullum

**Table S1.** Doubling time for filamenting *fim*<sup>+</sup> and *fim*<sup>−</sup> cells in suspension and on the different surfaces. Error represents a 95% confidence interval.

| On surface              |                          | Doubling time (min) |
|-------------------------|--------------------------|---------------------|
| <i>fim</i> <sup>−</sup> | <i>man</i> <sup>3+</sup> | 37 ± 4              |
| <i>Fim</i> <sup>+</sup> | <i>man</i> <sup>0</sup>  | 30 ± 3              |
|                         | <i>man</i> <sup>1</sup>  | 30 ± 3              |
|                         | <i>man</i> <sup>3+</sup> | 33 ± 5              |
| in suspension           |                          |                     |
| • OD                    |                          |                     |
| <i>fim</i> <sup>−</sup> |                          | 21 ± 6              |
| <i>fim</i> <sup>+</sup> |                          | 20 ± 3              |
| • microscope            |                          |                     |
| <i>fim</i> <sup>−</sup> |                          | 20 ± 3              |
| <i>fim</i> <sup>+</sup> |                          | 23 ± 5              |

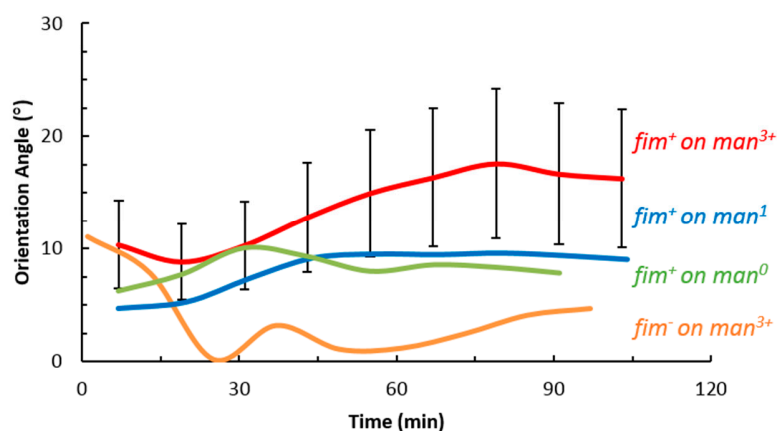

**Figure S1.** Dynamic orientation angle during cell filamentation on substrates. The orientation angle between the ends of the growing filaments and the flow direction is shown as a function of time for the various surfaces and bacterial strains examined. Error bars representing the standard error are shown for *fim*<sup>+</sup> on *man*<sup>3+</sup>; the error bars for the other lines are omitted for clarity but are of similar sizes or smaller than *fim*<sup>+</sup> on *man*<sup>3+</sup>.

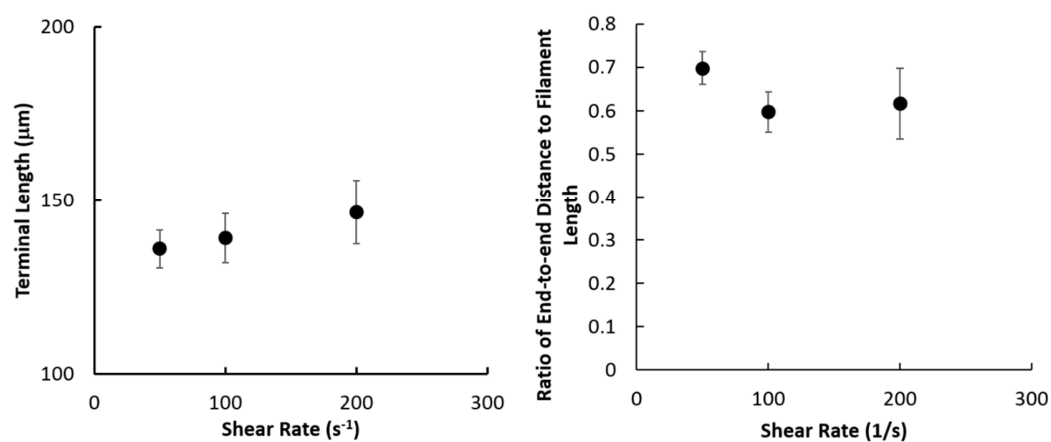

**Figure S2.** Investigation of shear effect on terminal length and buckling geometry of *fim<sup>+</sup>* filamentous cells. Terminal length (left) and ratio between end-to-end and terminal lengths (right) for *fim<sup>+</sup>* filaments on BSA substrates as functions of shear rate. The error bars represent standard error from measurements of at least 8 filaments.
